# Supplementary material for: Annual Case Volume and One-Year Mortality for Endovascular Treatment in Acute Ischemic Stroke
Source: PubMed Central journal article supplement — J Korean Med Sci. 2022 Sep 7;37(36):e270. doi: 10.3346/jkms.2022.37.e270 (PMC9485065; doi:10.3346/jkms.2022.37.e270), 2022-09-07
Supplement: jkms-37-e270-s001.pdf [file jkms-37-e270-s001.pdf]

**Supplementary Table 1.** Endovascular treatment rates among acute ischemic stroke patients in acute stroke quality assessment periods

|                               | March to May 2013<br>(N=7,550) | June to August 2014<br>(N=7,470) | July to December 2016<br>(N=19,624) |
|-------------------------------|--------------------------------|----------------------------------|-------------------------------------|
| Endovascular treatment, n (%) | 269 (3.6)                      | 278 (3.7)                        | 1,291 (6.6)                         |
