# Supplementary material for: Annual Case Volume and One-Year Mortality for Endovascular Treatment in Acute Ischemic Stroke
Source: PubMed Central journal article supplement — J Korean Med Sci. 2022 Sep 7;37(36):e270. doi: 10.3346/jkms.2022.37.e270 (PMC9485065; doi:10.3346/jkms.2022.37.e270), 2022-09-07
Supplement: jkms-37-e270-s002.pdf [file jkms-37-e270-s002.pdf]

Supplementary Fig. 1. Study population

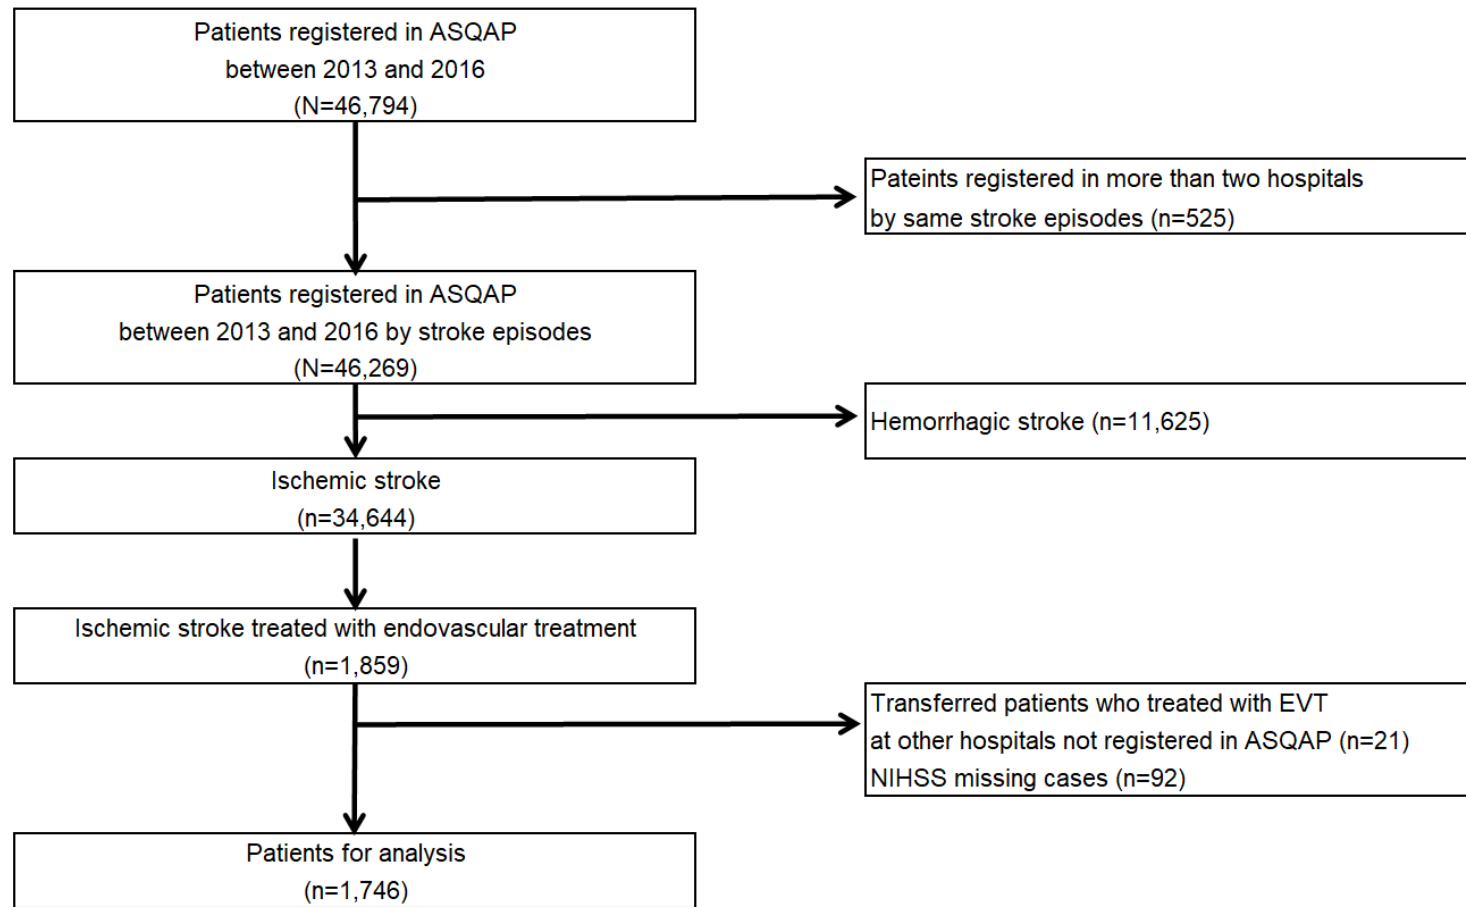

ASQAP = Acute Stroke Quality Assessment Program, EVT = endovascular treatment, NIHSS = National Institutes of Health Stroke Scale.
