# Supplementary material for: Annual Case Volume and One-Year Mortality for Endovascular Treatment in Acute Ischemic Stroke
Source: PubMed Central journal article supplement — J Korean Med Sci. 2022 Sep 7;37(36):e270. doi: 10.3346/jkms.2022.37.e270 (PMC9485065; doi:10.3346/jkms.2022.37.e270), 2022-09-07
Supplement: jkms-37-e270-s003.pdf [file jkms-37-e270-s003.pdf]

**Supplementary Fig. 2.** Predicted probabilities of non-linear effect of annual EVT case volume per hospital using 2018 Acute Stroke Quality Assessment Program database.

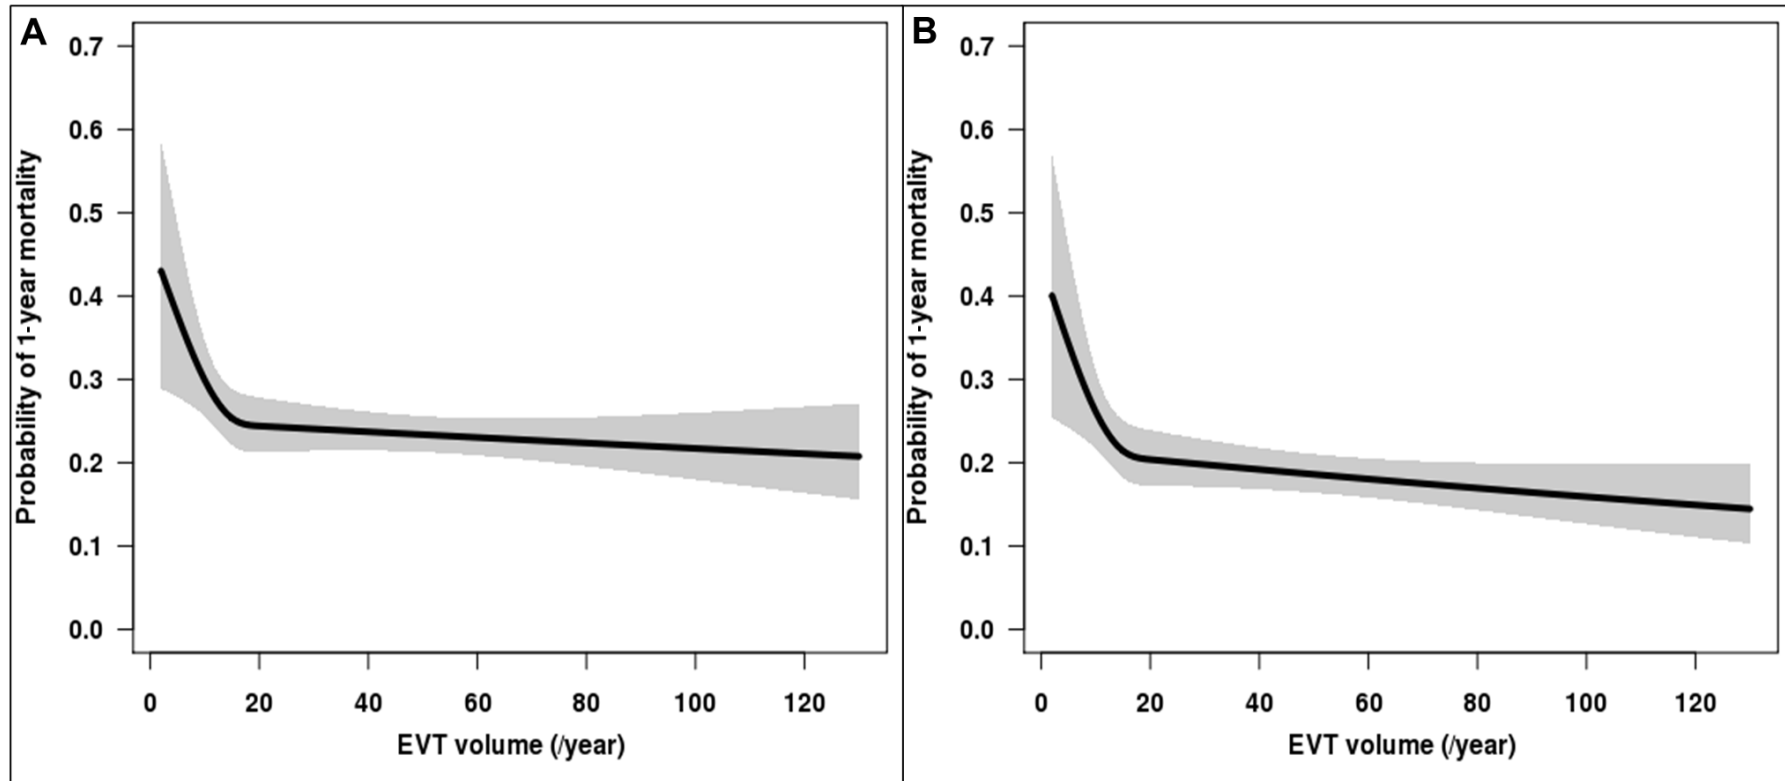

Predicted probabilities of non-linear effect of annual EVT case volume on unadjusted (A,  $p=0.021$  [ $p=0.010$  for overall effect]) and adjusted 1-year mortality (B,  $p=0.022$  [ $p=0.001$  for overall effect]). Cut-off value=15. Adjusted for age, sex, NIHSS score, and onset-to-door time.

Abbreviation: EVT, endovascular treatment; NIHSS, National Institute of Health Stroke Scale.
